# Molecular mechanisms in fungal fatty acid synthase (FAS) assembly

Authors: Manuel Fischer<sup>a</sup>, Barbara Mulinacci<sup>b</sup>, Mirko Joppe<sup>a</sup>, Ronald Vollrath<sup>b</sup>, Kosta Konstantinidis<sup>b</sup>,  
Peter Kötter<sup>c</sup>, Luciano Ciccarelli<sup>d</sup>, Janet Vonck<sup>d</sup>, Dieter Oesterhelt<sup>b</sup> and Martin Grninger<sup>a,b\*</sup>

Author affiliations:

(a) Institute of Organic Chemistry and Chemical Biology, Buchmann Institute for Molecular Life Sciences, Goethe University Frankfurt, Max-von-Laue-Str. 15, 60438 Frankfurt am Main, Germany.

(b) Department of Membrane Biochemistry, Max Planck Institute of Biochemistry, Am Klopferspitz 18, 82152 Martinsried, Germany.

(c) Institute of Molecular Genetics and Cellular Microbiology, Goethe University Frankfurt, Max-von-Laue-Str. 9, 60438 Frankfurt am Main, Germany.

(d) Department of Structural Biology, Max Planck Institute of Biophysics, Max-von-Laue-Str. 3, 60438 Frankfurt am Main, Germany.

\*Corresponding author: [grninger@chemie.uni-frankfurt.de](mailto:grninger@chemie.uni-frankfurt.de)

Abbreviations: FA, fatty acids; FAS, fatty acid synthase; fFAS, fungal fatty acid synthase; PPT, phosphopantetheine transferase; ACP, acyl carrier protein; KS, ketoacyl synthase; KR, ketoacyl reductase; PKS, polyketide synthase

Character count (excl. Abstract, Figures Legends, Experimental Procedures and Supplemental Information):

**about 3900 words**

Supporting Information includes 9 figures and 5 tables and can be found with this article online at:

33 **Abstract**

34 The fungal fatty acid synthase (fFAS) multienzyme is a barrel-shaped 2.6 MDa complex comprising six  
35 times eight catalytic domains. Upon barrel-formation, up to several hundred kDa large polypeptides  
36 intertwine to bury about 170,000 Å<sup>2</sup> of protein surface. Functional, regulatory and structural data as  
37 well as evolutionary aspects of fFAS have been elucidated during the last decades. Notwithstanding a  
38 profound knowledge of this protein family, the biogenesis of the elaborate structure remained elusive.  
39 Remarkably, experimental data have recently demonstrated that fFAS self-assembles without the  
40 assistance of specific factors. Considering the infinitesimal probability that the barrel-shaped complex  
41 forms simply by domains approaching in the correct orientation, we were interested in understanding  
42 the sequence of events that have to orchestrate fFAS assembly. Here, we show that fFAS attains its  
43 quaternary structure along a pathway of successive domain-domain interactions, which is strongly  
44 related to the evolutionary development of this protein family. The knowledge on fFAS assembly may  
45 pave the way towards antifungal therapy, and further develops fFAS as biofactory in technological  
46 applications.

## 47 Introduction

48 Fatty acid synthases (FAS) have been structurally studied during the last years, and a deep  
49 understanding about the molecular foundations of *de novo* fatty acid (FA) synthesis has been  
50 achieved <sup>1-3</sup> (**Figure S1A and B**). The architecture of fungal FAS (fFAS) was elucidated for the  
51 proteins from *Saccharomyces cerevisiae* (baker's yeast) <sup>4-6</sup> and the thermophilic fungus *Thermomyces*  
52 *lanuginosus* <sup>7</sup>, revealing an elaborate 2.6 MDa large  $\alpha_6\beta_6$  barrel-shaped complex that encapsulates  
53 fungal *de novo* FA synthesis in its interior (**Figure 1A**). The functional domains are embedded in a  
54 scaffolding matrix of multimerization and expansion elements. Acyl carrier protein (ACP) domains,  
55 shuttling substrates and intermediates inside the reaction chamber, achieve compartmentalized  
56 synthesis <sup>4,8</sup> (**Figure 1B and C**). The concept of metabolic crowding makes fFAS a highly efficient  
57 catalytic machinery, running synthesis at micromolar virtual concentrations of active sites and  
58 substrates <sup>9</sup>. The outstanding efficacy in fungal FA synthesis is documented by (engineered) oleagenic  
59 yeast that can grow to lipid cellular contents of up to 90% <sup>10</sup>. fFAS have also raised interest as  
60 biofactories in microbial production of value-added compounds from saturated carbon chains <sup>11-13</sup>.  
61 Facing the complexity of the fFAS structure, we recently started the project of deciphering its assembly  
62 mechanism. We were interested in two aspects. First, based on the observation that fFAS can be  
63 recombinantly expressed in *E. coli* <sup>14,15</sup>, it can be posited that specific assembly factors are not  
64 required for fFAS biogenesis. Autonomous self-assembly of fFAS may essentially be envisioned by  
65 distributing the complexity of the assembly process onto a sequence of domain-domain interactions  
66 that are formed one after another. We aimed to explore this sequence of events and to analyze  
67 whether it can be correlated to the evolutionary development of fFAS, since it has been suggested that  
68 assembly pathways generally reflect protein evolution <sup>16</sup>. Second, we sought to evaluate whether the  
69 knowledge on fFAS assembly may be exploited for inhibiting *de novo* fungal FA synthesis in selective  
70 antifungal therapy <sup>17-19</sup>, as well as for designing fFAS based biofactories <sup>20</sup>.  
71 Our studies of the *S. cerevisiae* FAS assembly were greatly aided by engineering fFAS on the basis of  
72 the available atomic resolution models <sup>4-7,21</sup>. Wildtype and several engineered *S. cerevisiae* FAS  
73 constructs were used for complementing a FAS-deficient yeast strain. Full-length and truncated *S.*  
74 *cerevisiae* FAS constructs were further recombinantly expressed in *Escherichia coli*. These tools in  
75 hand, we were able to address fFAS assembly in a "forward-approach", which means that instead of  
76 often-performed dissociation based ("reverse") approaches, we generated information based on halted  
77 assembly states and truncated structures. Here, we present a multitude of data suggesting that *S.*  
78 *cerevisiae* FAS autonomously assembles via a single dominant pathway, which we outline in three key  
79 processes and correlate to the evolutionary development of fFAS. The molecular details of fFAS  
80 biogenesis provide the basis for a structure-based design of assembly inhibitors and may further pave  
81 the way for designing complex compartmentalized synthetic pathways.

82



101 **Results**

102 The fFAS family is topologically heterogeneous on gene level: Genome sequence analysis has  
 103 characterized fFAS as a heterogeneous family comprising different gene-topological variants (**Figure**  
 104 **2A**). As most evident gene-topological variation, fFAS are either encoded by single genes or by two  
 105 genes. Two-gene-encoded fFAS appear to originate from a single-gene encoded precursor split into  
 106 two at various fission sites that are generally located within domains <sup>3,22</sup>. In *S. cerevisiae* and *T.*  
 107 *lanuginosus* FAS, both representing the *Ascomycota*-type fFAS, the C-terminus of the  $\beta$ -chain and the  
 108 N-terminus of the  $\alpha$ -chain intertwine to form the MPT domain (**Figure 2Bi**) <sup>4,7</sup>. In *Tremellomyces*-type  
 109 fFAS, the termini of polypeptide chains form a 4-helical bundle (4HB) at the interface of the KR and the  
 110 KS domain (**Figure 2Bii**). At the *Rhodospordium toruloides* FAS fission site chains share an  
 111 antiparallel  $\beta$ -sheet (SBS) domain, but, different to *Ascomycota*- and *Tremellomyces*-type FAS, the  
 112 termini do not intertwine <sup>14</sup> (**Figure 2Biii**). Gene topological variations are also apparent in the  
 113 distribution of insertion elements that scaffold the fFAS barrel (see **Figure 1** and **2A**). While the  
 114 dimerization module DM3 is highly conserved in type I FAS <sup>22</sup>, the trimerization module (TM) and  
 115 dimerization module (DM2) do not occur in ancestral variants and the evolutionarily related bacterial  
 116 type I FAS.  
 117

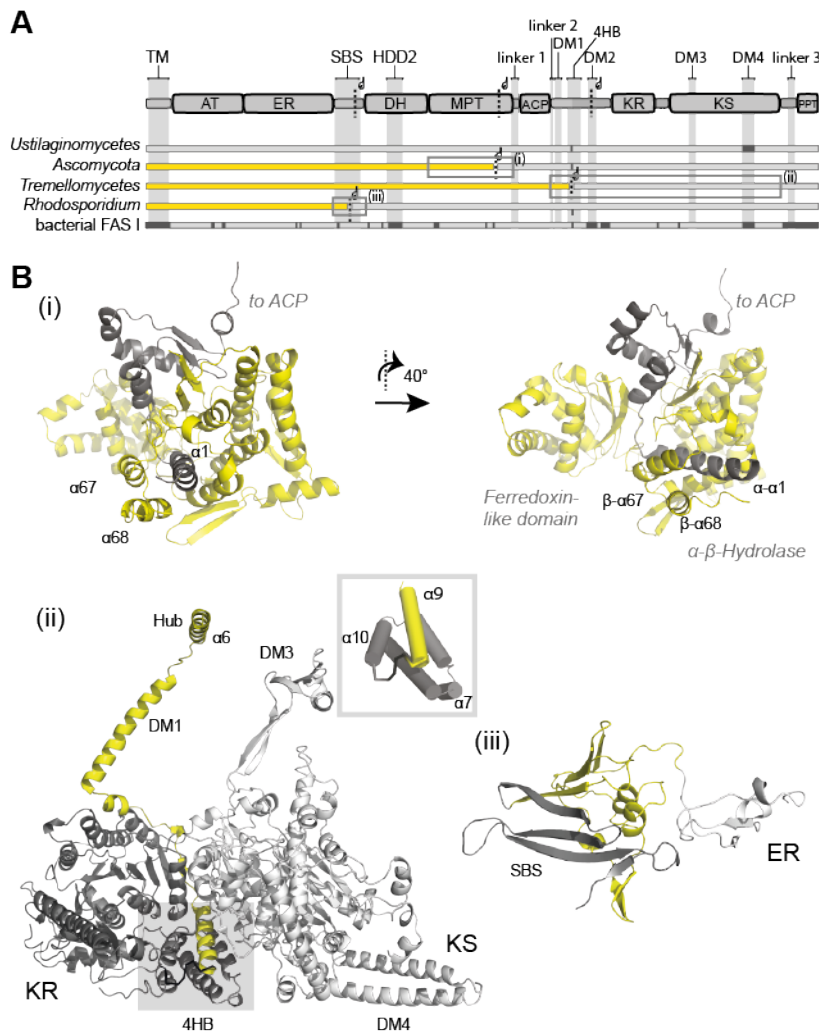

118 **Figure 2. The fFAS family.** **A** Topological variants of fFAS. Domain architecture is given for single-chain fFAS.  
 119 Abbreviations used as in **Figure 1**. Four fFAS variants differing in fission sites as well as in the distribution of  
 120



121 insertion elements are given (missing insertions in dark grey). *Ustilaginomycetes*-type FAS carries all domains on  
122 a single chain (single polypeptide), *Ascomycetes*-type (including *S. cerevisiae* and *C. albicans*), *Tremellomycetes*-  
123 type (including *C. neoformans* and *C. gattii*) and *Rhodospordium*-type FAS I are two-gene encoded variants.  
124 Substructures of *S. cerevisiae* FAS shown in panel B are highlighted by grey frames. Yellow and grey coloring  
125 indicate *FAS1*-encoded polypeptides ( $\beta$ -chains) and *FAS2*-encoded polypeptides ( $\alpha$ -chains), respectively.  
126 **B** Substructures of *S. cerevisiae* FAS depicting the fission sites in fFAS variants. Secondary structure elements  
127 are shown in *S. cerevisiae* FAS numbering as introduced by Jenni *et al.* <sup>7</sup>. Coloring as in **Figure 2A**. Fission site  
128 of *Ascomycetes*-type FAS within the MPT domain is shown in two orientations **(i)**, of *Tremellomycetes*-type FAS  
129 within the 4HB (see also inset) **(ii)**, and of *Rhodospordium*-type FAS with the antiparallel  $\beta$ -sheet domain (SBS)  
130 **(iii)**. For an extended version of this figure see **Figure S2**.

131  
132 In a first experiment, we analyzed the assembly of above described fFAS variants by constructing  
133 gene topologies with *S. cerevisiae* FAS. The fFAS variants were rebuilt in *S. cerevisiae* FAS by initially  
134 engineering a single-gene encoding fFAS with *FAS1* and *FAS2* connected by a sequence that natively  
135 links the two genes in *Ustilago maydis* FAS (*Sc\_fas1-fas2*). Taking this construct as a template, we  
136 then engineered splitting sites as occurring in *Tremellomycetes*-type (*Sc\_Tre*) and *Rhodospordium*-  
137 type FAS (*Sc\_Rho*) (see **Figure 2Bii** and **iii**, and **Figure S2A** and **B**). In the experimental procedure, a  
138 FAS-deficient *S. cerevisiae* strain, growing on external FA, was complemented by plasmids encoding  
139 the fFAS variants (**Table S1**) <sup>23,24</sup>. All three constructs successfully complemented the deficiency in *de*  
140 *novo* FA synthesis of the FAS-deficient yeast, as read-out by growth rates in FA-limited liquid cultures  
141 and by spot dilutions on medium without added FA. We also performed Native-PAGE with Western-  
142 Blot detection to visualize intact barrel-shaped FAS in *S. cerevisiae* cytosolic fractions. For analysis,  
143 we blotted cell lysates of the complemented FAS-deficient *S. cerevisiae* strains separated by Native-  
144 PAGE, and made *S. cerevisiae* FAS visible with polyclonal rabbit anti-FAS antibodies <sup>25</sup>. All three  
145 constructs successfully complemented the deficiency in *de novo* FA synthesis of the FAS-deficient  
146 yeast, as well as assembled to the barrel-shaped complex (**Figure S3A-C**). Our data show that the  
147 fission event, which splits the single-gene encoding fFAS into two-gene encoding fFAS and is a late  
148 step in evolution <sup>3,22</sup>, is rebuilt early in the assembly by the interaction of chain termini. This early  
149 interaction may also be seen as event happening prior to the actual assembly (as the specific process  
150 of barrel formation) that captures all variants to assemble via a single assembly pathway; in line with  
151 the conception of the high evolutionary conservation of assembly pathways in protein families <sup>26</sup>. We  
152 term this assembly step “pseudo-single chain formation” in the following.

153 To evaluate the impact of insertion elements on fFAS assembly, we further engineered fFAS  
154 constructs with the  $\beta$ -chain's N-terminal trimerization module TM or/and the  $\alpha$ -chain embedded  
155 dimerization module DM2 deleted (see **Figure 2A**). The TM closes the barrel at its apical sites and  
156 DM2 is placed at the outer barrel perimeter. DM2 increases the KR/KR interface as shown in the  
157 crystal structure of *T. lanuginosus* FAS <sup>7</sup>. Native PAGE Western Blot analysis indicates intact  
158 assembly of the deletion mutants, again demonstrating the high evolutionary conservation of the  
159 assembly pathway within the fFAS family (**Figure 3A**). Further protein properties were determined *in*  
160 *vitro* on the purified proteins by performing size exclusion chromatography (SEC), a thermal shift  
161 assay (TSA) and an enzymatic activity assay with the purified Strep-tagged constructs (**Figure 3B-C**).  
162 SEC and TSA data show compromised stability of the proteins with deleted insertion elements,

163 documented by an increased tendency to aggregation in SEC and a drop in protein melting  
 164 temperature in TSA. A decrease in overall FA synthesizing activity from initial  $2953 \pm 205$  mU/mg for  
 165 wildtype FAS to  $833 \pm 73$  mU/mg for the  $\Delta$ TM deletion,  $1069 \pm 97$  mU/mg for the  $\Delta$ DM2 deletion and  
 166 to  $466 \pm 125$  mU/mg for the double deletion well correlates with protein stability measures. Data  
 167 indicate that the insertion modules TM and DM2 are not essential for assembly, but stabilize the fFAS  
 168 barrel and increase the fFAS catalytic efficacy. Many of the scaffolding elements, i.e. the elements that  
 169 are not strictly conserved within the fFAS protein family like TM and DM2, have appeared at a later  
 170 stage during protein evolution, when the elaborate barrel-shaped fold had been already developed<sup>22</sup>.  
 171  
 172

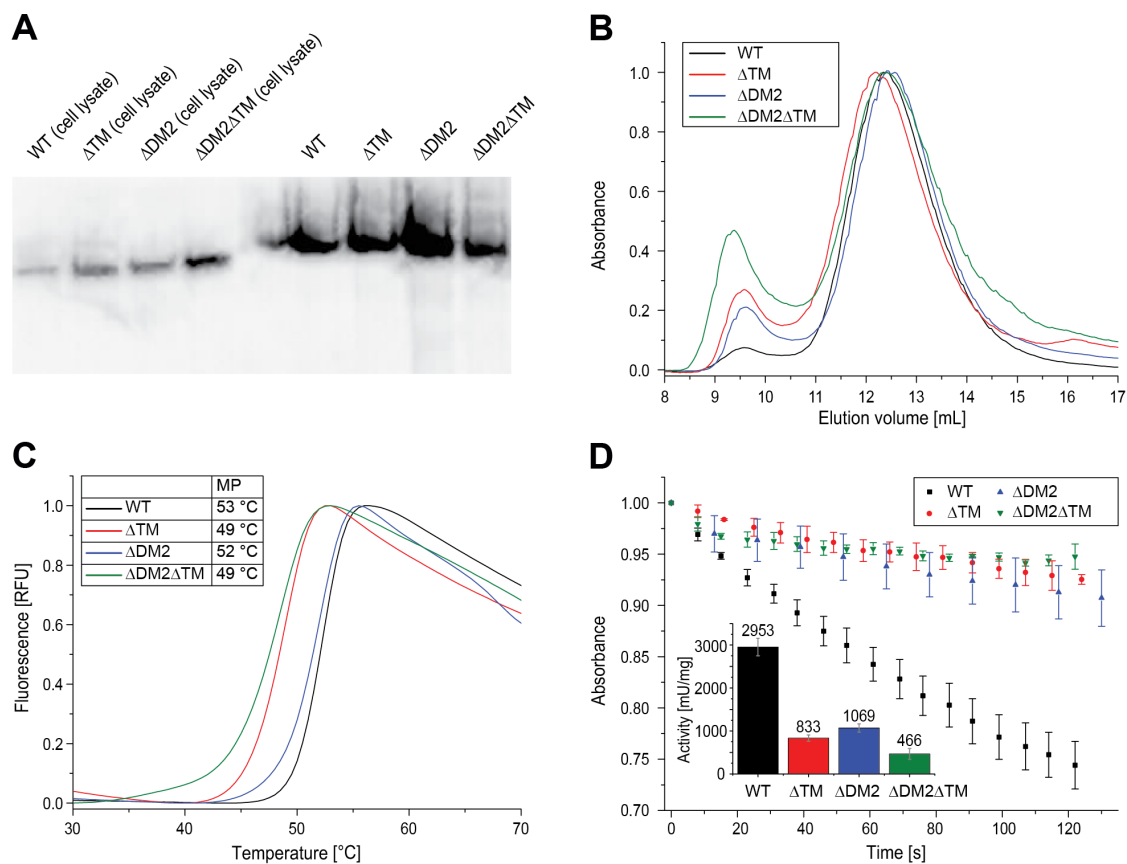

173  
 174  
 175 **Figure 3. Purification and analysis of fFAS with deletion of insertion elements.** **A** Native PAGE Western Blot  
 176 of *S. cerevisiae* FAS constructs from cell lysates (left) and after purification (right) as indicated. WT = wild type. **B**  
 177 FAS constructs as shown in panel A were purified with SEC (Superose 6 increase 10/300 GL, buffer: 100 mM  
 178 sodium phosphate pH = 6.5, 200 mM sodium chloride). UV absorption at 280 nm has been normalized. **C** Typical  
 179 melting curves of FAS constructs received in TSA. Fluorescence has been normalized. Average melting  
 180 temperatures (MP) of two technical replicates are shown in inset table. The difference between technical  
 181 replicates was smaller than 0.5 °C. **D** Activity assay of FAS constructs shows as time course of NADPH  
 182 absorption at 334 nm. Inset diagram shows calculated specific activities (in mU/mg) as bars. Average and  
 183 standard deviation ( $\pm 1 \sigma$ ) of three technical replicates are shown for each construct.

184  
 185

186 “Pseudo-single chain” formation is an early event in fFAS assembly: To validate the relevance of  
187 pseudo-single chain formation as an early step in fFAS assembly, we generated a set of *S. cerevisiae*  
188 FAS mutants that modulate the MPT interface. The MPT interface contributes a marginal amount to  
189 the overall about 170,000 Å<sup>2</sup> of protein surface being buried upon barrel formation <sup>7</sup>. Therefore, we  
190 assumed that MPT mutants should only affect barrel assembly, if MPT formation by the α- and the β-  
191 chain indeed constitutes an early event in the assembly. We initially tested two FAS constructs; (i) β-  
192 chain deleted in the C-terminal helices α67 and α68 (pRS415\_Δ*fas1*Δα67/68) combined with wildtype α-  
193 chain (pRS413\_Δ*FAS2*) yielding strain *Sc\_Δα67/68*, and (ii) wildtype β-chain (pRS415\_Δ*FAS1*)  
194 combined with α-chain deleted in about half of the N-terminal α1-helix (amino acids K2 to H11;  
195 pRS413\_Δ*fas2*Δα1(2-11)) giving strain *Sc\_Δα1(2-11)*. Both complementation constructs reduce the  
196 interface of α-chain/β-chain interactions in the MPT domain. Both of these constructs did not or just  
197 very poorly restore *de novo* FA synthesis in the FAS-deficient yeast strain (**Figure 4A and B**). As the  
198 complementation assay does not indicate whether absent activity can indeed be attributed to an  
199 abolished assembly or is rather caused by the compromised catalytic activity of assembled fFAS, we  
200 also performed Native-PAGE with Western-Blot detection. Both strains *Sc\_Δα67/68* and *Sc\_Δα1(2-11)*  
201 did not contain assembled FAS (**Figure 4C**). Non-assembled polypeptides were not visible in Native-  
202 PAGE, which is best interpreted as degradation of non-assembled FAS as suggested earlier <sup>25,27</sup>.  
203 Absence of assembled FAS, as a result of transcriptional down-regulation or RNA instability instead of  
204 assembly failure, can be excluded for the *fas2*Δ*αas2-11*-construct based on a previous study showing  
205 constant expression of a *fas2-lacZ*-fusion-gene lacking the first 39 nucleotides of the *FAS2* open  
206 reading frame <sup>28</sup>.  
207 We further modulated the interface of chains in the two-gene encoding fFAS variants *Sc\_Tre* and  
208 *Sc\_Rho* (see **Figure S3A-C**). We deleted the N-terminal three α-helices of the *Tremellomyces*-type  
209 mimicking FAS α-chain and the N-terminal β-sheet of the *Rhodospiridium*-type mimicking FAS α-  
210 chain giving strains *Sc\_Tre\_Δα10-12* and *Sc\_Rho\_Δ(1-53)*, respectively. Both strains failed to restore  
211 *de novo* FA synthesis, demonstrating the broad impact of the early interaction of termini (pseudo-  
212 single chain formation) in fFAS assembly (**Figure S4A-C**).  
213  
214 As a next step in the analysis of the chain interaction, we mutated the MPT interface of *S. cerevisiae*  
215 FAS and cloned constructs with point mutations in helix α1 (**Figure 4D**). Amino acids K2, E6, E8 and  
216 H11 were selected as candidates based on their conservation in *Ascomycota*-type FAS, and mutated  
217 to their most frequent exchanges in non-*Ascomycota*-type FAS. (**Figure 4E**). All single mutated  
218 constructs (pRS415\_Δ*FAS1*; mutated pRS413\_Δ*fas2*\*; K2S, E6V, E8R and H11A) were able to restore  
219 *de novo* FA synthesis in the FAS deficient yeast strain. However, double mutated constructs,  
220 permutating the above amino acid exchanges, identified K2S-E8R-double mutated FAS as assembly  
221 deficient (see **Figure 4A-C**). To better understand the impact of mutations, we analyzed custom-  
222 synthesized peptide fragments in their secondary structure by CD-spectroscopy in co-solvents <sup>29</sup>. We  
223 observed a high propensity of α1-peptide to form a helix, which was even more pronounced in the  
224 K2S-E8R-mutated peptide (**Figure 4F**). According to these data, the assembly defect by the K2S-E8R  
225 mutation, as observed in the complementation assay (see **Figure 4A-E**), may either originate from



226 changed specific interaction by amino acid exchanges, or from changed  $\alpha$ -helical properties of the  
 227 mutated  $\alpha$ 1-helix that interferes in local assembly properties.  
 228

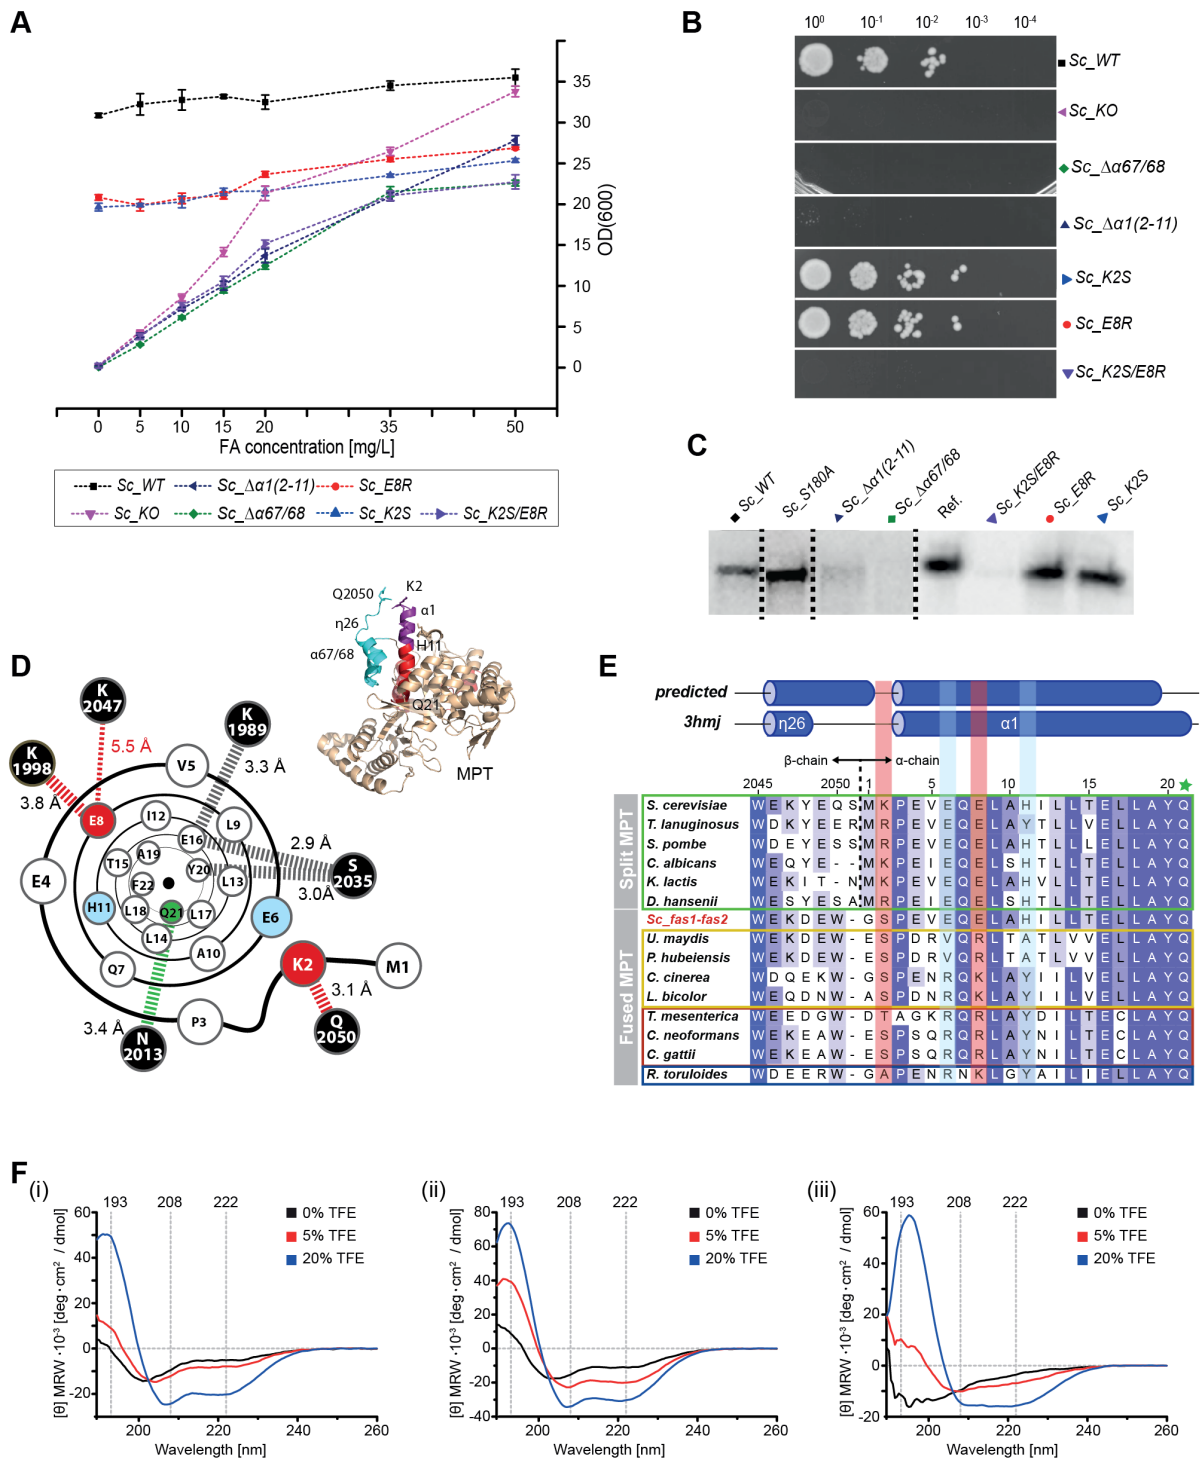

229 **Figure 4. Interaction of  $\alpha$ -chain and  $\beta$ -chain in the MPT domain for pseudo-single chain formation.** Details  
 230 and abbreviations of complementation constructs are outlined in **Table 1**. **A** Growth behavior of mutated strains in  
 231 liquid cultures supplemented with external FA. Experimentally determined values (each in 5 technical replicates;  
 232 error bars represent  $\pm 3 \sigma$ ); measuring points are connected by dashed lines for clarity. For biological replicates,  
 233 see **Figure S4A-C** and **Table S2**. Please note that the relatively higher ODs for WT and KO originate from  
 234 deviant starting conditions, as they were precultured in YPD-FA instead of SD-FA medium (see Supplemental  
 235 Information). **B** Ten-fold serial dilutions (starting from OD(600) = 1) of log-phase cultures spotted on YPD agar  
 236

237 without external FA supply after incubation for 48 h at 30 °C. **C** Native-PAGE-Western-Blot analysis of FAS from  
 238 mutant strains grown to the log-phase. Bands indicate presence or absence of intact FAS barrels. As reference,  
 239 we used purified FAS from *S. cerevisiae*. For clarity, the figure has been assembled from different blots as  
 240 indicated by dashed lines. For the complete blots, see **Figure S5A-C**. **D** Cartoon illustrating the  $\alpha$ 1-helix with key  
 241 polar interactions to the  $\beta$ -chain (black spheres) represented by dashed bars. Distances as indicated are  
 242 calculated from the X-ray structure (PDB-code: 3hmj)<sup>21</sup>. Amino acids that were sensitive to mutations in the FAS  
 243 assembly process are shown as red spheres; insensitive mutations are shown as blue spheres, and the catalytic  
 244 Q21 (involved in the catalytic triad of the MPT active site) as green sphere. For guidance, the MPT domain of *S.*  
 245 *cerevisiae* FAS is shown as inset. **E** Alignment of sequences covering the  $\alpha$ 1-helix (*S. cerevisiae* FAS  
 246 numbering). Sequences include *Ascomycota*-type FAS (green box), single-gene encoded fFAS (yellow),  
 247 *Tremellomycetes*-type FAS (red), *Rhodospiridium*-type FAS (blue) and the engineered *fas1-fas2*-fusion strain *Sc-*  
 248 *fas1-fas2*. The alignment was created with Clustal Omega on the EBI webserver based on the full length FAS  
 249 sequence and colored according to occurrence<sup>30</sup>. Two-genes encoded FAS were submitted as *FAS1-FAS2*-  
 250 fusions. Predicted *S. cerevisiae* FAS secondary structure from PsiPred<sup>31</sup> and the secondary structure as  
 251 observed in the X-ray crystal structure (PDB-code: 3hmj) are attached. Loci that are mutation sensitive in  
 252 *Ascomycota*-type FAS assembly are highlighted by a red background; two further loci, which we have exchanged  
 253 in mutational studies are in blue, and the catalytically relevant Q21 is indicated by a green star. Uniprot (or  
 254 GenBank in case of *Tremella mesenterica*) accession numbers of sequences are: *Candida albicans* (P34731,  
 255 P43098), *Coprinopsis cinerea* (A8NUB3), *Cryptococcus gattii* (E6R622, E6R621), *Cryptococcus neoformans*  
 256 (Q5KG98, Q5KG99), *Debaryomyces hansenii* (Q6BWV8, Q6BWN1), *Kluyveromyces lactis* (Q6CWN6, Q6CT25),  
 257 *Laccaria bicolor* (B0D9Q1), *Pseudozyma hubeiensis* (R9P8H2), *Rhodospiridium toruloides* (M7WSW5,  
 258 M7XM89), *Saccharomyces cerevisiae* (P07149, P19097), *Schizosaccharomyces pombe* (Q9UUG0, Q10289),  
 259 *Thermomyces lanuginosus* (A4VCJ6, A4VCJ7), *Tremella mesenterica* (XP\_007006732.1, XP\_007006745.1),  
 260 *Ustilago maydis* (A0A0D1C5S0). **F** Analysis of custom-synthesized peptide fragments CD-spectroscopy recorded  
 261 at different TFE concentrations; peptides  $\alpha$ 1 (i), K2S-E8R-mutated  $\alpha$ 1 (ii) and in  $\alpha$ 67/68 (iii). For growth behavior  
 262 of additional mutants, see **Figure S4C, Tables S3, S4 and S5**.

263  
264

265 **Table 1. *S. cerevisiae* FAS strains used in this study.** The ability for complementation is shown in  
 266 **Figure 4A-C and Figure S4A.**

| Strain                           | FAS genotype (on pRS)                       |
|----------------------------------|---------------------------------------------|
| <i>Sc</i> <i>KO</i>              | $\Delta$ <i>fas1</i> / $\Delta$ <i>fas2</i> |
| <i>Sc</i> <i>WT</i>              | <i>FAS1</i> / <i>FAS2</i>                   |
| <i>Sc</i> <i>K2S</i>             | <i>FAS1</i> / <i>fas2_K2S</i>               |
| <i>Sc</i> <i>E8R</i>             | <i>FAS1</i> / <i>fas2_E8R</i>               |
| <i>Sc</i> <i>K2S/E8R</i>         | <i>FAS1</i> / <i>fas2_K2S/E8R</i>           |
| <i>Sc</i> $\Delta\alpha$ 1(2-11) | <i>FAS1</i> / <i>fas2_Δα1(2-11)</i>         |
| <i>Sc</i> $\Delta\alpha$ 67/68   | <i>fas1_Δα67/68</i> / <i>FAS2</i>           |
| <i>Sc</i> <i>S180A</i>           | <i>FAS1</i> / <i>fas2_S180A</i>             |

267  
268

269 Post-translational modification occurs within a dimeric sub-structure: In a stepwise deconstruction  
 270 approach, we dissected fFAS into domains and multi-domain constructs, which we then analyzed in  
 271 structural properties and catalytic activity. Since the proteolytic degradation of the *S. cerevisiae* FAS  
 272 chains has been reported as a regulatory step of  $\alpha/\beta$  expression<sup>25</sup>, we expressed proteins  
 273 recombinantly in *E. coli*. We demonstrated the suitability of *E. coli* as an expression host by  
 274 successfully producing *S. cerevisiae* FAS and an *Ustilaginomycetes*-type mimicking *fas1-fas2* fusion

275 protein. This was not unexpected, since the expression of other fFAS constructs in *E. coli* as well as  
276 the fFAS homologous bacterial type I FAS occurring in *Corynebacteria*, *Mycobacteria* and *Nocardia*  
277 (CMN-bacterial FAS) has been reported before (**Figure S7A-D**)<sup>14,15,32,33</sup>. For the deconstruction  
278 approach, we focused on the  $\alpha$ -chain. The  $\alpha$ -chain harbors the relevant domains for post-translational  
279 modification as well as the domains contributing most of the overall 170,000 Å<sup>2</sup> buried surface of fFAS.  
280 The  $\beta$ -chain was not proteolytically stable as a separate protein in *E. coli*, which impaired *in vitro*  
281 assembly experiments.

282  
283 We dissected the  $\alpha$ -chain from its C-terminus, and initially probed the role of the C-terminal PPT as a  
284 separate domain and as part of larger constructs. The structural frame of the post-translational  
285 phosphopantetheinylation can provide an important snapshot in fFAS assembly. The  
286 phosphopantetheinylation reaction in fFAS is largely restrained by the requirements of the domains  
287 ACP and PPT. As has been reported before, the ACP is monomeric, whereas the PPT domain is only  
288 active in a multimeric state<sup>21</sup>. As a separate domain, PPT occurs as a trimer<sup>21</sup>, as also described for  
289 the bacterial homolog AcpS<sup>34</sup>. SEC analysis of a KS-PPT di-domain construct showed a dimeric  
290 character of the KS-PPT substructure. It seems that the large dimeric interface of the KS dimer  
291 overrides the PPT trimeric preference. Constructs PPT and KS-PPT as well as *S. cerevisiae* FAS were  
292 phosphopantetheinylation-active (see **Figure 5A** and **Figure S8A**), indicating that the PPT domain is  
293 active in both its dimeric and trimeric state<sup>21</sup>. While ACP and PPT have to physically interact during  
294 phosphopantetheinylation, we were not able to identify stable ACP:PPT complexes by pull-down, co-  
295 purification and crosslinking experiments, indicating that the interaction is transient and unstable  
296 (**Figure S6A-C**).

297 N-terminal elongation of the KS-PPT construct by a sequence including DM1, DM2 and KR (construct  
298 termed  $\alpha_{\Delta}$ MPT-ACP) led to protein aggregation (**Figure 5B**). SEC analysis resulted in a sharp peak  
299 at an apparent mass of approximately 450 kDa, indicating a fraction of dimeric species, but mainly  
300 showed unspecific higher oligomerization/aggregation. Data do not support the formation of stable  $\alpha_6$ -  
301 wheel structures formed by  $\alpha_{\Delta}$ MPT-ACP. SEC elution fractions of  $\alpha_{\Delta}$ MPT-ACP still showed PPT-  
302 activity, which implies that structured dimeric KS-PPT cores remain intact upon aggregation (**Figure**  
303 **S8B**). Higher ratios of dimeric species were received, when the protein was purified under denaturing  
304 conditions and refolded by SEC or dialysis under low protein concentrations (see **Figure 5B**). Further  
305 N-terminal elongation to a  $\alpha_{\Delta}$ MPT construct as well as to the full-length  $\alpha$ -chain did not resolve  
306 aggregation formation. Intriguingly, in spite of aggregation, the ACP domain of  $\alpha_{\Delta}$ MPT was  
307 quantitatively phosphopantetheinylated (*in cis*). Phosphopantetheinylation of ACP was probed by  
308 inserting a TEV-proteolytic cleavage site in the linker C-terminal to ACP, allowing ESI-MS analysis of  
309 the separate ACP received after TEV-proteolytic digestion of  $\alpha_{\Delta}$ MPT aggregates (**Figure S9**).

310 Data collected on the truncated  $\alpha$ -chain constructs imply that the phosphopantetheinylation active  
311 species is dimeric, organized by the KS dimer as the prominent structural unit. It can further be  
312 concluded that the sequence ACP-KR-KS-PPT bears the information for forming the  
313 phosphopantetheinylation competent complex, but not for forming the D3 symmetric  $\alpha_6$ -wheel  
314 structures. Since the  $\alpha$ -chain constructs run into aggregation, but are nevertheless  
315 phosphopantetheinylated, it seems that the phosphopantetheinylation status of fFAS is not proofread

316 during assembly. For confirming this result, we analyzed the phosphopantetheinylation-deficient  
 317 S180A *S. cerevisiae* FAS in our assembly assay (see **Figure 3C**). The mutated construct was unable  
 318 to restore *de novo* FA synthetic activity in the complementation assay, but indeed assembled to the  
 319  $\alpha_6\beta_6$  complex, supporting an assembly process that does not supervise post-translational  
 320 phosphopantetheinylation. This observation is in agreement with a similar result received earlier<sup>35</sup>.  
 321

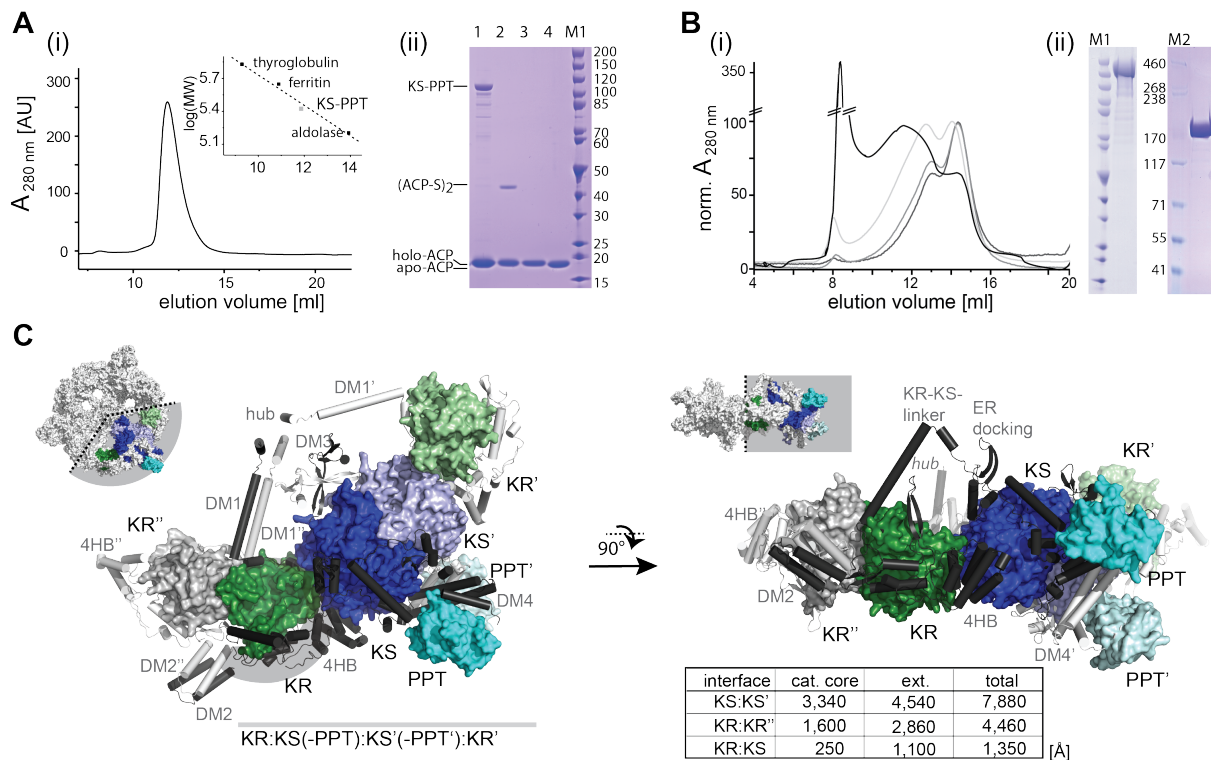

322 **Figure 5. Oligomeric requirements of  $\alpha$ -chain domains.** **A** Analysis of the KS-PPT di-domain construct. (i)  
 323 SEC on a Superdex 200 Tricorn 30/100 column and calibration curve in inset. The peak corresponds to an  
 324 apparent molecular weight of 250 kDa, equivalent to a stoichiometry of 2.5 (calculated molecular weight 99.5 kDa;  
 325 see also **Figure S6**), suggesting a dimer with increased apparent weight possibly due to a non-globular shape of  
 326 the protein. (ii) 4-12% Bis/Tris SDS-PAGE gel (NuPage, Invitrogen) of a phosphopantetheinylation assay. Holo-  
 327 ACP tends to dimerize *via* a disulfide formation, giving (ACP-S)<sub>2</sub>, which can be used as read-out for PPT activity.  
 328 The disulfide bond is cleaved under the reducing conditions of the sample loading buffer. Lane M, marker; 1,  
 329 reaction solution; 2, ACP purified from the reaction solution and loaded on gel under non-reducing conditions; 3,  
 330 same as 2 but loaded on gel under reducing conditions; 4, apo-ACP reference. For an extended presentation of  
 331 data see **Figure S8A**. **B** Analysis of the  $\alpha\Delta$ MPT-ACP construct. SEC on a Superose 6 Tricorn 30/100 column with  
 332 protein preparations from purifications under native and denaturing conditions. Peaks correspond to apparent  
 333 molecular weights of 400 kDa ( $\circ$ ), 600 kDa ( $\Delta$ ) and 800 kDa ( $\square$ ). The sharp peak in at about 8 ml corresponds to  
 334 protein aggregates eluting in the void volume. (ii) SDS-PAGE gels of purified  $\alpha\Delta$ MPT-ACP (see also **Figure S8B**).  
 335 **C** KR:KS(-PPT):KS'(-PPT'):KR' substructure and analysis of interfaces. Catalytic cores are colored as introduced  
 336 in **Figure 1**. Insertions are shown in cartoon representation in black. Interfaces are listed as table, and numbers  
 337 are given for the catalytic cores (cat. core) and the contributions by insertion elements (ext.). For stabilizing the  
 338 KR:KS interface, a large insertion, including the DM1-4HB connecting linker and 4HB, enwrap the KR (insertion  
 339 highlighted by grey background). For orientation,  $\alpha_6$ -wheel substructures are shown in insets. Calculation of  
 340 interfaces and their representation in this figure are based on *S. cerevisiae* FAS data<sup>21</sup> with modeled DM2<sup>7</sup>.  
 341  
 342

343  
344 Pseudo-single chain formation may be targeted in antifungal therapy: Fungal infections are an  
345 emerging threat to mankind <sup>36</sup>. Human pathogens are, among others, *Cryptococcus neoformans*,  
346 *Cryptococcus gattii* and species of the genus *Candida* <sup>37</sup>. *C. neoformans* and *C. gattii* are the  
347 causative agents of cryptococcosis, responsible for cutaneous and pulmonary infections, as well as  
348 meningitis <sup>38</sup>. *Candida* species are the most important causes of opportunistic mycosis, and  
349 responsible for mucosal, cutaneous and also invasive infections <sup>39</sup>. Instead of targeting active sites,  
350 which are conserved throughout bacteria and eukaryotes, assembly inhibition holds out the prospect  
351 for an ultra-selective antifungal therapy that leaves mammalian FAS I system as well as the  
352 mitochondrial and bacterial type II systems unaffected <sup>3</sup>. The early event of pseudo-single chain  
353 formation of fFAS may be of foremost relevance in such a concept, as it provides the chance to impair  
354 assembly by targeting a comparable small interface. For testing the approach, we designed  
355 constructs, in which the  $\beta$ -chain is elongated for internal competition in pseudo-single chain formation.  
356 The elongation of the 11 amino acid long  $\alpha$ 1-helix already compromised the ability to restore FA *de*  
357 *novo* synthesis, and the fusion of complete part  $\alpha$ -chain coded MPT turned out to be lethal (see  
358 **Figure S4A-C**).

## 359 360 **Discussion**

361 Data presented in this study indicate that the assembly of the  $\alpha_6\beta_6$  *S. cerevisiae* FAS essentially  
362 organizes into three key processes (**Figure 6**): (1) The collaboration of  $\alpha$ - and  $\beta$ -chain termini for the  
363 formation of pseudo-single chains is an early event in *S. cerevisiae* FAS assembly. The  $\alpha$ -chain N-  
364 terminus, likely already developed in its secondary structure, intertwines with a  $\beta$ -chain C-terminus by  
365 getting sandwiched between a structured MPT core fold and a  $\alpha$ 67/ $\alpha$ 68 element that may fold only  
366 upon interaction <sup>40</sup>. This initial interaction is sensitive to perturbations as indicated by two experimental  
367 set-ups. First, site directed mutagenesis identified two residues at the interface that are crucial for  
368 assembly and highly conserved in *Ascomycota*-type FAS (see **Figure 2A-F**). Second, the initial  
369 interaction can be competitively inhibited *in cis* (see **Figure S4 A-C**). This interaction may be an  
370 interesting target for antifungal therapy. (2) The second step in assembly is the formation of a dimeric  
371 unit as a platform for post-translational phosphopantetheinylation by the interaction of the domains  
372 ACP and PPT. The *S. cerevisiae* FAS KS:KS interface is the largest interface, comprising 7,880 Å<sup>2</sup>,  
373 and was characterized as evolutionarily ancient <sup>22</sup>. Similarly as having recruited other domains by  
374 gene fusion during the course of evolution, the KS dimer appears to have conserved its central role as  
375 nucleation site for assembly <sup>16,26</sup>. As disclosed by recombinant expressions in *E. coli* (see **Figure 5A-**  
376 **C**, and **Figure S8A and B**), the dominant structural role of the KS dimer is also evident in *S. cerevisiae*  
377 FAS subconstructs KS-PPT and  $\alpha$ <sub>Δ</sub>MPT-ACP (domains structure KR-KS-PPT). (3) The barrel-  
378 shaped structure encloses in a third and last process of assembly. On the way to forming the mature  
379  $\alpha_6\beta_6$ -complex, KR dimerization (including the adjacent scaffolding domains DM1 and DM2) contributes  
380 the largest remaining interface of 4,660 Å<sup>2</sup> (13,480 Å<sup>2</sup> upon  $\alpha_6$ -wheel assembly, see **Figure 5C**). The  
381  $\beta$ -chain adds comparably small interfaces. Here, most relevant is the AT domain interacting with the  
382 domains ER and MPT of the neighboring chains, as well as the trimerization of the TM scaffolding  
383 elements (see **Figure 1B**). fFAS specific insertions elements, as e.g. DM2 as well as the trimerization



384 domain TM, contribute to barrel stability, but are not of crucial importance for barrel biogenesis (see  
385 **Figure 5A-C**). This is also likely true for  $\alpha$ - $\beta$  connecting insertion elements (termed C-connections)  
386 that mediate interactions between  $\alpha_6$ -wheel and  $\beta_3$ -domes. The C1 insertion of the ER-domain  
387 mediating the interaction with the KS, the C2 hotdog domain insertion of DH-domain mediating the  
388 interaction with the KR-KS connecting helix, and the C3 insertion mediating the docking of the MPT-  
389 domain to the KR' are not uniformly distributed within the fFAS family (including ancestral fFAS and  
390 CMN-bacterial FAS)<sup>33,41</sup>, which speaks against their crucial function in fFAS assembly. Rather these  
391 the C-connections stabilize the barrel for improved protein stability and/or increased catalytic  
392 efficiency, as demonstrated experimentally for insertion elements DM2 and TM (see **Figure 3A-C**).

393  
394 As shown for *S. cerevisiae* FAS, fFAS assembly is robust and tolerates gene fusion and alternative  
395 gene fission (see **Figure S3**). Our data suggest that the key players driving assembly are mainly the  
396 catalytic domains that successively interact during assembly. The insertion elements stabilize the final  
397 barrel-shaped structure, and seem to be of minor significance for assembly except evolutionary  
398 ancient motifs as e.g. DM3<sup>22</sup>. fFAS is the most efficient *de novo* fatty acid (FA) synthesizing protein<sup>9</sup>.  
399 This property makes fFAS an attractive object in the endeavor to achieve microbial production of FA  
400<sup>42</sup>. The barrel-shaped fold has recently also been suggested as scaffold that may more generally be  
401 repurposed as microbial compartment for synthetic pathways<sup>20</sup>. Our data suggest that domains AT,  
402 ER and DH may indeed be susceptible to domain swapping to putatively enlarge and modify fFAS by  
403 new catalytic functions, while they similar show that engineering strategies have to preserve the  
404 domains KS, KR and MPT, owing to their structural tasks and roles in the assembly process.  
405 Engineering approaches that employ termini of insertion elements as docking or attachment sites may  
406 further allow enlarging the fFAS scaffold with new functions. Here, a core FA synthesizing unit may be  
407 decorated with FA modifying catalytic functions.

408 Data presented in this study are valuable for guiding biotechnological fFAS design: A recent approach  
409 has taken into account structural aspects and information towards the biogenesis of fFAS, and  
410 successfully added a thioesterase (TE) domain to the *S. cerevisiae* FAS by inserting the TE in the  
411 ACP linker sequences as well as at the C-terminus of the  $\alpha$ -chain<sup>13</sup>. An alternative approach was  
412 recently performed with the *Ascomycota*-type *Yarrowia lipolytica* FAS. For achieving short chain FA  
413 production, the C-terminal part of the split MPT was replaced with a TE domain, which, however,  
414 hampers the assembly to fully active intact protein, since interfering in pseudo-single chain formation.  
415 Such strategies can now be avoided when following the here presented guidelines<sup>43</sup>.

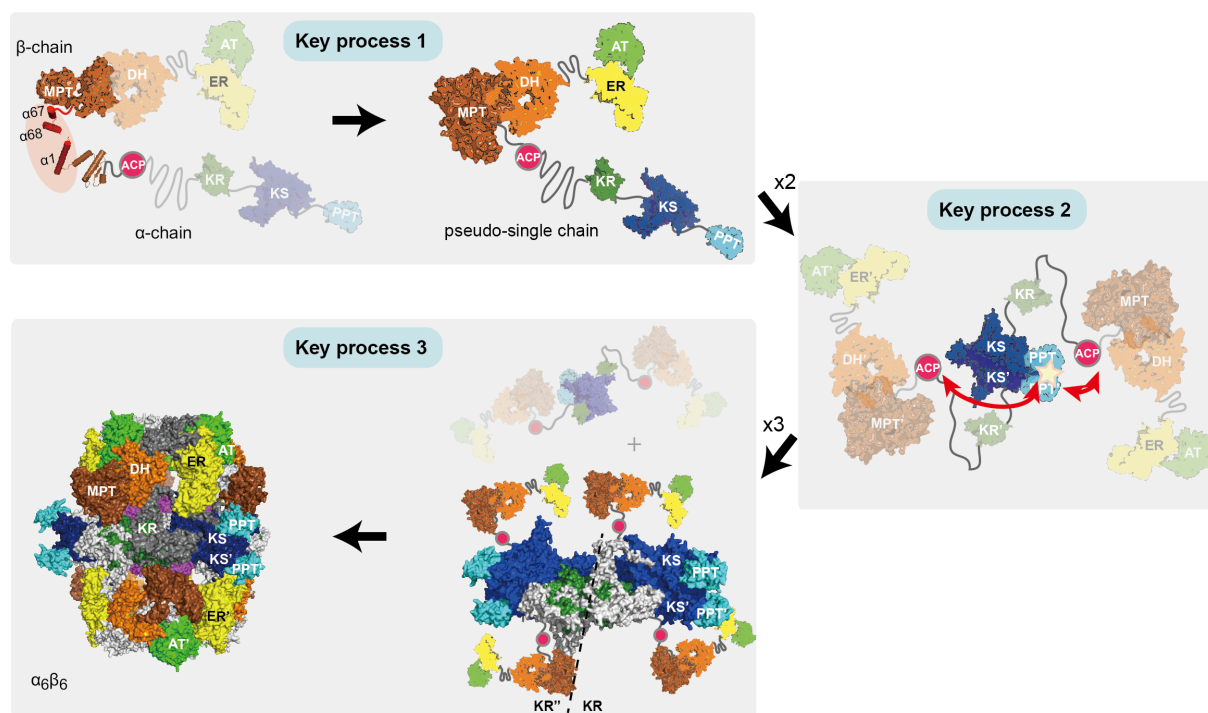

416  
417  
418  
419  
420  
421  
422  
423

**Figure 6. Model for the assembly of *S. cerevisiae* FAS in three key processes.** The integration of termini for the formation of the MPT proceeds early in assembly. The KS dimerization, that occurs subsequently or concerted to process 1, establishes dimeric units that act as platform for the phosphopantetheinylation of ACP by PPT. Finally, abstracted in key process 3, the C2 symmetric dimeric units trimerize to overall D3 symmetric barrel-shaped structures.

## 424 **Conclusion**

425 The 2.6 MDa fungal fatty acid synthase (fFAS) is among the most elaborate protein complexes known  
426 to date, and an interesting object for studying the assembly of multidomain proteins. The fFAS protein  
427 family comprises a heterogeneous class of proteins: fFAS are built from one or two polypeptides, and  
428 insertion elements that scaffold the barrel structure are non-uniformly distributed among the variants in  
429 the fFAS<sup>2,3</sup>. A conserved assembly pathway needs to reconcile all the individual topologies found in  
430 the fFAS family<sup>26</sup>.

431 Our approach of analyzing the molecular mechanisms in fFAS assembly was strongly guided by  
432 correlating the assembly pathway to the evolutionary development of the fFAS protein family. To  
433 disclose the assembly pathway and its molecular mechanisms, we performed *in vivo* mutational  
434 studies as well as the *in vitro* analysis of full-length and truncated proteins. We finally show data that  
435 characterize fFAS assembly as progressing through three key processes. In the initial step, the  
436 polypeptide chains of two-gene encoding fFAS interact via a small interface for pseudo-single chain  
437 formation, while the following steps include the formation of larger domain-domain interfaces. We  
438 show that the initial interaction is sensitive to small perturbations, which may be exploited in ultra-  
439 selective inhibition of *de novo* FA synthesis in antifungal therapy. As one of the most intriguing aspects  
440 of this study, the assembly pathway appears to be entirely sequence coded. The assembly does not  
441 require external factors nor does it involve stalled intermediate state, i.e. for proof-reading crucial post-  
442 translational phosphopantetheinylation. Overall, assembly pathway shows a high plasticity that well  
443 corresponds to the heterogeneity of the protein family. This property makes fFAS a suitable scaffold  
444 for engineering compartmentalized biosynthetic pathways<sup>11,13,20</sup>.

## 447 **Experimental Procedures**

448 Please find a detailed description of the experimental design in **Supplemental Experimental**  
449 **Procedures**.

450 Plasmids and transformation: Yeast plasmids have a pRS backbone with centromeric replication site<sup>23</sup>  
451 and were cloned with homologous recombination in *S. cerevisiae* or with the Infusion HD cloning kit  
452 (Clontech, USA) in *E. coli*. All *FAS1* and *FAS2* derived constructs carry the native promoter and  
453 terminator sequences<sup>24</sup>. Yeast transformation was done with the LiOAc-method<sup>44</sup>. *E. coli* plasmids  
454 have a pET22b backbone (Novagen, USA) and were cloned with the Infusion HD cloning kit (Clontech,  
455 USA) (see **Table S1**).

456 Creation of FAS deficient *S. cerevisiae* strain *BY.PK1238\_KO*: Strains *Y25032* and *Y21061* were  
457 transformed with pMF001 and, after two rounds of sporulation, yielded the haploid  $\Delta fas1$ ;  $\Delta fas1$  strain.  
458 Rejection of the rescue plasmid pMF001 was achieved via selection with 5-fluoroorotic acid.

459 Protein purification: Wild type FAS from *S. cerevisiae* as well as  $\Delta TM$ ,  $\Delta DM2$  and  $\Delta TM \Delta DM2$  deletion  
460 mutants were isolated as Strep-I-tagged proteins from *S. cerevisiae* with basal expression. Purification  
461 of other FAS constructs for *in vitro* studies was achieved from homologous expressions in *E. coli*

462 Liquid culture growth assay: Cells from single yeast colonies were picked to inoculate 5 mL cultures in  
463 appropriate selection medium containing 200  $\mu\text{g/mL}$  geneticin disulfate, free FA (myristic, palmitic and  
464 stearic acid, each 50 mg/L) and 1% Tergitol NP-40. After growth at 30 °C and 200 rpm, pre-cultures of

465 same media were inoculated, and grown at 30 °C and 200 rpm to OD(600) 1-14. For 5 mL main  
466 cultures in YPD (containing 1% Tergitol NP-40, varying FA concentrations and 200 µg/mL geneticin  
467 disulfate), reproducible inocula were obtained by using a standardized inoculum procedure to yield a  
468 constant starting OD(600) of  $32 \times 10^{-3}$ . The cultures were incubated for 24 h at 30 °C and 200 rpm.  
469 Serial dilution growth assay: Cells were precultured as mentioned above and in 4-fold 1:10 serial  
470 dilutions starting from OD(600) 1 transferred onto YPD agar plates without FA. Growth differences  
471 were recorded following incubation of the plates for 2-3 days at 30 °C.  
472 Native PAGE with Western Blot analysis: *S. cerevisiae* cultures were grown to OD(600) 1 to 2 in  
473 appropriate selection medium containing 200 µg/mL geneticin disulfate, free FA (myristic, palmitic and  
474 stearic acid, each 50 mg/L) and 1% Tergitol NP-40. Cells were lysed with Zymolyase and lysates were  
475 concentrated to total protein concentrations between 1 mg/mL and 5 mg/mL. Native-PAGE (3-12%  
476 Bis-Tris gels, Novex, Life Technologies, US) was performed with varying volumes to achieve identical  
477 total protein amounts for every sample. As reference, a total amount of 0.1 to 0.2 µg purified *S.*  
478 *cerevisiae* FAS was loaded. After electrophoresis in Blue Native buffer system (Serva Electrophoresis  
479 GmbH, Germany) and blotting onto a polyvinylidene difluoride membrane (Immobilon-FL, Merck  
480 Millipore, Germany) by electro-transfer, FAS proteins were detected with rabbit anti-FAS antiserum<sup>25</sup>  
481 and horseradish peroxidase conjugated goat anti-rabbit IgG (Pierce, Thermo Fisher Scientific, USA).  
482 Luminescence was induced with peroxidase substrate (Carl Roth GmbH, Germany).  
483  
484 Protein purification and protein biochemical assays: methods for purification of different FAS  
485 constructs and fragments as well as for thermal shift and activity assay are given in the supplementary  
486 materials and methods.  
487  
488 CD-spectroscopy: The peptides  $\alpha 1$  (MKPEVEQELAHILLTELLAYQ-NH<sub>2</sub>),  $\alpha 1_{K2S/E8R}$   
489 (MSPEVEQRLAHILLTELLAYQ-NH<sub>2</sub>) and  $\alpha 67/68$  (Ac-VTKEYFQDVYDLTGSEPIKEIIDNWEKYEQ)  
490 (CASLO ApS, Denmark) were measured at 40 µM in buffer (100 mM NaPi, pH 7.2) with varying  
491 volume fractions of 2,2,2-Trifluoroethanol (Alfa Aesar, Johnson Matthey GmbH, Germany) on a Jasco  
492 J810 spectrometer (Jasco GmbH, Germany).

493  
494  
495

## 496 **Acknowledgements**

497 We are grateful to Patrik Johansson for starting the project with us. We thank Michael Thumm (Georg  
498 August University Göttingen) for providing anti-FAS antiserum, and the EMBL Heidelberg for providing  
499 the plasmid pET28M-Sumo1. We received assistance from Merle Hantsche in performing ACP-PPT  
500 interactions studies, and Jurema Schmidt and Veysel Erdel in setting up the Native-PAGE with  
501 Western Blotting. We are also grateful to Rudolf Glockshuber, Michael Groll, Werner Kühlbrandt, Rolf  
502 Marschalek, Nina Morgner and Harald Schwalbe for valuable discussions on this topic. Furthermore  
503 we, again, thank Harald Schwalbe and Harald Hofbauer for support in CD-spectroscopy. This work  
504 was supported by a Lichtenberg Grant of the Volkswagen Foundation to M.G. (grant number 85 701).  
505

506 **Author Contributions**

507 M.F. rationally engineered FAS constructs, set-up and performed the complementation assay, purified  
508 FAS, performed CD-spectroscopic studies, analyzed data and wrote the manuscript; B.M. and R.V.  
509 purified and analyzed FAS and FAS constructs from recombinant expressions in *E. coli*; M.J. purified  
510 FAS constructs from yeast expression, performed activity assays, thermo shift experiments and  
511 analyzed the data; K.K. cloned the  $\alpha_{\Delta}$ MPT-tev construct and was involved in cloning and expressing  
512 of other FAS constructs; P.K. was main responsible in constructing the FAS deficient *S. cerevisiae*  
513 strain *BY.PK1238\_KO*; L.C. and J.V. performed negative stain electron microscopic studies on the *S.*  
514 *cerevisiae* FAS and the  $\beta$ -chain  $\alpha$ -chain fusion construct recombinantly expressed in *E. coli*; D.O.  
515 analyzed data; M.G. expressed and analyzed proteins, analyzed data, designed research and wrote  
516 the paper.

517

518 **Competing interests**

519 The authors have no financial or non-financial competing interests.



520 **References**

- 521
- 522
- 523 1 White, S. W., Zheng, J., Zhang, Y.-M. & Rock, C. O. The structural biology of type II fatty acid  
524 biosynthesis. *Annu Rev Biochem.* **74**, 791-831 (2005).  
525
- 526 2 Maier, T., Leibundgut, M., Boehringer, D. & Ban, N. Structure and function of eukaryotic fatty  
527 acid synthases. *Q Rev Biophys.* **43**, 373-422 (2010).  
528
- 529 3 Grininger, M. Perspectives on the evolution, assembly and conformational dynamics of fatty  
530 acid synthase type I (FAS I) systems. *Curr Opin Struct Biol.* **25**, 49-56 (2014).  
531
- 532 4 Leibundgut, M., Jenni, S., Frick, C. & Ban, N. Structural basis for substrate delivery by acyl  
533 carrier protein in the yeast fatty acid synthase. *Science* **316**, 288-290 (2007).  
534
- 535 5 Lomakin, I. B., Xiong, Y. & Steitz, T. A. The crystal structure of yeast fatty acid synthase, a  
536 cellular machine with eight active sites working together. *Cell* **129**, 319-332 (2007).  
537
- 538 6 Johansson, P. *et al.* Inhibition of the fungal fatty acid synthase type I multienzyme complex.  
539 *Proc Natl Acad Sci U S A.* **105**, 12803-12808 (2008).  
540
- 541 7 Jenni, S. *et al.* Structure of fungal fatty acid synthase and implications for iterative substrate  
542 shuttling. *Science* **316**, 254-261 (2007).  
543
- 544 8 Gipson, P. *et al.* Direct structural insight into the substrate-shuttling mechanism of yeast fatty  
545 acid synthase by electron cryomicroscopy. *Proc Natl Acad Sci U S A.* **107**, 9164-9169 (2010).  
546
- 547 9 Fischer, M. & Grininger, M. Strategies in megasynthase engineering – fatty acid synthases  
548 (FAS) as model proteins. *Beilstein J Org Chem.* **13**, 1204-1211 (2017).  
549
- 550 10 Blazeck, J. *et al.* Harnessing *Yarrowia lipolytica* lipogenesis to create a platform for lipid and  
551 biofuel production. *Nat Commun.* **5**, 3131, (2014).  
552
- 553 11 Gajewski, J. *et al.* Engineering fatty acid synthases for directed polyketide production. *Nat*  
554 *Chem Biol.* **13**, 363-365 (2017).  
555
- 556 12 Gajewski, J., Pavlovic, R., Fischer, M., Boles, E. & Grininger, M. Engineering fungal de novo  
557 fatty acid synthesis for short chain fatty acid production. *Nat Commun.* **8**, 14650 (2017).  
558
- 559 13 Zhu, Z. *et al.* Expanding the product portfolio of fungal type I fatty acid synthases. *Nat Chem*  
560 *Biol.* **13**, 360-362 (2017).  
561
- 562 14 Fischer, M. *et al.* Cryo-EM structure of fatty acid synthase (FAS) from *Rhodospiridium*  
563 *toruloides* provides insights into the evolutionary development of fungal FAS. *Protein Sci.* **24**,  
564 987-995 (2015).  
565
- 566 15 Enderle, M., McCarthy, A., Paithankar, K. S. & Grininger, M. Crystallization and X-ray  
567 diffraction studies of a complete bacterial fatty-acid synthase type I. *Acta Crystallogr F Struct*  
568 *Biol Commun.* **71**, 1401-1407 (2015).  
569
- 570 16 Levy, E. D., Boeri Erba, E., Robinson, C. V. & Teichmann, S. A. Assembly reflects evolution of  
571 protein complexes. *Nature* **453**, 1262-1265 (2008).  
572
- 573 17 Chayakulkeeree, M., Rude, T. H., Toffaletti, D. L. & Perfect, J. R. Fatty acid synthesis is  
574 essential for survival of *Cryptococcus neoformans* and a potential fungicidal target.  
575 *Antimicrobial Agents and Chemotherapy* **51**, 3537-3545 (2007).  
576
- 577 18 Nguyen, L. N., Trofa, D. & Nosanchuk, J. D. Fatty acid synthase impacts the pathobiology of  
578 *Candida parapsilosis* in vitro and during mammalian infection. *PLoS One* **4(12):e8421** (2009).  
579

- 580 19 Nguyen, L. N. *et al.* Inhibition of *Candida parapsilosis* fatty acid synthase (Fas2) induces  
581 mitochondrial cell death in serum. *PLoS Pathog.* **8**, e1002879 (2012).  
582
- 583 20 Maier, T. Fatty acid synthases: Re-engineering biofactories. *Nat Chem Biol.* **13**, 344-345  
584 (2017).  
585
- 586 21 Johansson, P. *et al.* Multimeric options for the auto-activation of the *Saccharomyces*  
587 *cerevisiae* FAS type I megasynthase. *Structure* **17**, 1063-1074 (2009).  
588
- 589 22 Bukhari, H. S. T., Jakob, R. P. & Maier, T. Evolutionary Origins of the Multienzyme  
590 Architecture of Giant Fungal Fatty Acid Synthase. *Structure* **22**, 1775-1785, (2014).  
591
- 592 23 Sikorski, R. S. & Hieter, P. A system of shuttle vectors and yeast host strains designed for  
593 efficient manipulation of DNA in *Saccharomyces cerevisiae*. *Genetics* **122**, 19-27 (1989).  
594
- 595 24 Chirala, S. S. Coordinated regulation and inositol-mediated and fatty acid-mediated repression  
596 of fatty acid synthase genes in *Saccharomyces cerevisiae*. *Proc Natl Acad Sci U S A.* **89**,  
597 10232-10236 (1992).  
598
- 599 25 Egner, R. *et al.* Tracing intracellular proteolytic pathways. Proteolysis of fatty acid synthase  
600 and other cytoplasmic proteins in the yeast *Saccharomyces cerevisiae*. *J Biol Chem.* **268**,  
601 27269-27276 (1993).  
602
- 603 26 Marsh, J. A. *et al.* Protein complexes are under evolutionary selection to assemble via ordered  
604 pathways. *Cell* **153**, 461-470 (2013).  
605
- 606 27 Schüller, H. J., Förtsch, B., Rautenstrauss, B., Wolf, D. H. & Schweizer, E. Differential  
607 proteolytic sensitivity of yeast fatty acid synthetase subunits alpha and beta contributing to a  
608 balanced ratio of both fatty acid synthetase components. *Eur J Biochem.* **203**, 607-614 (1992).  
609
- 610 28 Wenz, P., Schwank, S., Hoja, U. & Schueller, H.-J. A downstream regulatory element located  
611 within the coding sequence mediates autoregulated expression of the yeast fatty acid  
612 synthase gene FAS2 by the FAS1 gene product. *Nucleic Acids Res.* **29**, 4625-4632 (2001).  
613
- 614 29 Buck, M. Trifluoroethanol and colleagues: cosolvents come of age. Recent studies with  
615 peptides and proteins. *Q Rev Biophys.* **31**, 297-355 (1998).  
616
- 617 30 Sievers, F. *et al.* Fast, scalable generation of high-quality protein multiple sequence  
618 alignments using Clustal Omega. *Mol Syst Biol.* **7**, 1-6 (2011).  
619
- 620 31 Buchan, D. W. A., Minneci, F., Nugent, T. C. O., Bryson, K. & Jones, D. T. Scalable web  
621 services for the PSIPRED Protein Analysis Workbench *Nucleic Acids Res.* **41**, W340-W348  
622 (2013).  
623
- 624 32 Stuible, H. P., Meurer, G. & Schweizer, E. Heterologous expression and biochemical  
625 characterization of two functionally different type I fatty acid synthases from *Brevibacterium*  
626 *ammoniogenes*. *Eur J Biochem.* **247**, 268-273 (1997).  
627
- 628 33 Ciccarelli, L. *et al.* Structure and conformational variability of the *Mycobacterium tuberculosis*  
629 fatty acid synthase multienzyme complex. *Structure* **21**, 1251-1257 (2013).  
630
- 631 34 Lambalot, R. H. *et al.* A new enzyme superfamily - the phosphopantetheinyl transferases.  
632 *Chem Biol.* **3**, 923-936 (1996).  
633
- 634 35 Fichtlscherer, F., Wellein, C., Mittag, M. & Schweizer, E. A novel function of yeast fatty acid  
635 synthase. Subunit alpha is capable of self-pantetheinylation. *Eur J Biochem.* **267**, 2666-2671  
636 (2000).  
637
- 638 36 Fisher, M. C. *et al.* Emerging fungal threats to animal, plant and ecosystem health. *Nature*  
639 **484**, 186-194 (2012).  
640

- 641 37 Shapiro, R. S., Robbins, N. & Cowen, L. E. Regulatory circuitry governing fungal development,  
642 drug resistance, and disease. *Microbiol Mol Biol Rev.* **75**, 213-267 (2011).  
643
- 644 38 Chayakulkeeree, M. & Perfect, J. R. Cryptococcosis. *Infect Dis Clin North Am.* **20**, 507-544  
645 (2006).  
646
- 647 39 Pfaller, M. A. & Diekema, D. J. Epidemiology of invasive candidiasis: a persistent public health  
648 problem. *Clin Microbiol Rev.* **20**, 133-163 (2007).  
649
- 650 40 Uversky, V. N. The most important thing is the tail: multitudinous functionalities of intrinsically  
651 disordered protein termini. *FEBS Lett* **587**, 1891-1901(2013).  
652
- 653 41 Kikuchi, S., Rainwater, D. L. & Kolattukudy, P. E. Purification and characterization of an  
654 unusually large fatty acid synthase from *Mycobacterium tuberculosis* var. *bovis* BCG. *Arch*  
655 *Biochem Biophys.* **295**, 318-326 (1992).  
656
- 657 42 d'Espaux, L., Mendez-Perez, D., Li, R. & Keasling, J. D. Synthetic biology for microbial  
658 production of lipid-based biofuels. *Curr Opin Chem Biol.* **29**, 58-65 (2015).  
659
- 660 43 Xu, P., Qiao, K., Ahn, W. S. & Stephanopoulos, G. Engineering *Yarrowia lipolytica* as a  
661 platform for synthesis of drop-in transportation fuels and oleochemicals. *Proc Natl Acad Sci U*  
662 *S A.* **113**, 10848-10853 (2016).  
663
- 664 44 Gietz, R. D. & Schiestl, R. H. High-efficiency yeast transformation using the LiAc/SS carrier  
665 DNA/PEG method. *Nat Protoc.* **2**, 31-34 (2007).  
666
